1  
2  
3  
4  
5  
6  
7  
8  
9  
10  
11  
12  
13  
14  
15  
16  
17  
18  
19  
20  
21  
22  
23  
24  
25  
26  
27  
28  
29  
30

**The 3' UTR of *vigR* is required for virulence in *Staphylococcus aureus* and has expanded through STAR sequence repeat insertions**

Daniel G. Mediati<sup>1</sup>, William Dan<sup>1</sup>, David Lalaouna<sup>2</sup>, Hue Dinh<sup>3</sup>, Alaska Pokhrel<sup>3</sup>, Timothy P. Stinear<sup>4</sup>, Amy K. Cain<sup>3</sup>, Jai J. Tree<sup>1,\*</sup>

<sup>1</sup>School of Biotechnology and Biomolecular Sciences, University of New South Wales, Sydney, NSW Australia

<sup>2</sup>Université de Strasbourg, CNRS, ARN UPR 9002, Strasbourg, France

<sup>3</sup>School of Natural Sciences, ARC Centre of Excellence in Synthetic Biology, Macquarie University, Sydney, NSW Australia

<sup>4</sup>Department of Microbiology and Immunology, Peter Doherty Institute, University of Melbourne, VIC Australia

\*Corresponding author: Jai J. Tree ([j.tree@unsw.edu.au](mailto:j.tree@unsw.edu.au))

31 **ABSTRACT**

32

33 *Staphylococcus aureus* is an adaptable human pathogen causing life-threatening endocarditis  
34 and bacteraemia. Methicillin-resistant *S. aureus* (MRSA) is alarmingly common, and  
35 treatment is confined to last-line antibiotics. Vancomycin is the treatment of choice for  
36 MRSA bacteraemia and vancomycin treatment failure is often associated with vancomycin-  
37 intermediate *S. aureus* strains termed VISA. The regulatory 3' UTR of *vigR* mRNA  
38 contributes to vancomycin tolerance in the clinical VISA isolate JKD6008 and upregulates  
39 the lytic transglycosylase *IsaA*. Using MS2-affinity purification coupled with RNA  
40 sequencing (MAPS), we find that the *vigR* 3' UTR also interacts with mRNAs involved in  
41 carbon metabolism, amino acid biogenesis, cell wall biogenesis, and virulence. The *vigR* 3'  
42 UTR was found to repress *dapE*, a succinyl-diaminopimelate desuccinylase required for  
43 lysine and cell wall peptidoglycan synthesis, suggesting a broader role in controlling cell wall  
44 metabolism and vancomycin tolerance. Deletion of the *vigR* 3' UTR increased VISA  
45 virulence in a wax moth larvae model, and we find that an *isaA* mutant is completely  
46 attenuated in the larvae model. Sequence and structural analysis of the *vigR* 3' UTR indicates  
47 that the UTR has expanded through the acquisition of *Staphylococcus aureus* repeat  
48 insertions (STAR repeats) that partly contribute sequence for the *isaA* interaction seed and  
49 may functionalise the 3' UTR. Our findings reveal an extended regulatory network for *vigR*,  
50 uncovering a novel mechanism of regulation of cell wall metabolism and virulence in a  
51 clinical *S. aureus* isolate.

52

## 53 INTRODUCTION

54 *Staphylococcus aureus* is an adaptable human pathogen and a major cause of life-threatening  
55 endocarditis and bacteraemia (Tong et al., 2015). *S. aureus* colonises almost every site in the  
56 human body and is increasingly associated with colonisation of medical implants. Treatment  
57 has been complicated by the emergence of antibiotic-resistant strains, particularly methicillin-  
58 resistant *S. aureus* (MRSA) where treatment is limited to last-line antibiotics. The cell wall-  
59 targeting glycopeptide antibiotic vancomycin is the treatment of choice for MRSA  
60 bacteraemia. However, vancomycin treatment failure is increasingly common and attributed  
61 to MRSA isolates (up to 13%) with intermediate vancomycin resistance (4-8µg/mL) termed  
62 vancomycin-intermediate *S. aureus* (VISA) (Howden et al., 2010). VISA isolates have  
63 thicker bacterial cell walls that likely limits the permeability of vancomycin to the division  
64 septum where binding to cell wall precursors occurs. Single nucleotide polymorphisms in  
65 transcriptional regulators have been reported (Howden et al., 2010), suggesting that loss-of-  
66 function mutations and changes in gene regulation promote vancomycin tolerance.

67  
68 Regulatory non-coding RNA (ncRNA) are gene regulators that typically range from 50-500  
69 nt and control the expression of target messenger RNA (mRNA) through direct base-pairing.  
70 Interactions between ncRNA-mRNA can promote or inhibit degradation by cellular  
71 ribonucleases such as RNases that are often associated with the RNA degradosome (Bandyra  
72 et al., 2012; Papenfort et al., 2013). The canonical pathway of gene regulation involves  
73 occluding the ribosomal binding site (RBS) of a target mRNA leading to translational  
74 repression (Bouvier et al., 2008; Jagodnik et al., 2017). Bacterial regulatory ncRNAs have  
75 notable roles in regulating several biological processes including the modulation of the  
76 bacterial cell wall (recently reviewed in Mediati et al., 2021), carbon metabolism (reviewed  
77 in Durica-Mitic et al., 2018) and virulence (reviewed in Sy et al., 2021). In *S. aureus*, the  
78 non-coding small RNA (sRNA) SprD, that is expressed from a pathogenicity island, was  
79 shown to repress the immune-evasion protein Sbi and is required for infection in a murine  
80 sepsis model (Chabelskaya et al., 2010). More recently, the sRNA RsaX28 (Ssr42) was  
81 implicated in the murine model of skin and soft tissue infection and regulates the expression  
82 of multiple virulence factors including the  $\alpha$  and  $\gamma$  haemolysins, and capsule protein Cap5a  
83 through indirect regulation of Rsp (Das et al., 2016; Morrison et al., 2012), and through direct  
84 interactions with the  $\delta$  haemolysin and enterotoxin I transcripts (*hld* and *sei*) (McKellar et al.,  
85 2022).

86

87 The untranslated regions (UTRs) of bacterial mRNAs can act as regulatory elements by base-  
88 pairing with target mRNAs, affecting translation and transcript stability. In our previous  
89 work, we demonstrated that the unusually long 3' UTR of the *vigR* mRNA mediates  
90 vancomycin tolerance by upregulation of the cell wall lytic transglycosylase IsaA (Mediati et  
91 al., 2022). Some 3' UTRs of mRNAs have been found to expand through insertion of  
92 sequence repeats including *Alu* elements in eukaryotes (Mayr, 2017) and IS elements in  
93 bacteria (Menendez-Gil et al., 2020). In *S. aureus*, the genome contains *Staphylococcus*  
94 *aureus* repeat insertions (STAR repeats) that are short, repetitive motifs often separated by  
95 spacer sequences (Cramton et al., 2000). While the distribution of STAR repeats varies  
96 between closely related Staphylococci species, *S. aureus* isolates of the same evolutionary  
97 lineage (i.e., same multi-locus sequence-type) maintain a similar arrangement of STAR  
98 repeats (Purves et al., 2012). STAR repeats have been linked to pathogenesis (Purves et al.,  
99 2012), however their function, acquisition, and mechanism of propagation all remain unclear.

100

101 We have recently profiled the *in vivo* RNA interactome associated with the double-stranded  
102 RNA-specific endonuclease RNase III and mapped these interactions to genomic elements in  
103 the clinical MRSA isolate JKD6009 (McKellar et al., 2022; Mediati et al., 2022).

104 Surprisingly, we found that the *vigR* 3' UTR functions as a regulatory mRNA 'hub' required  
105 for glycopeptide tolerance (Mediati et al., 2022). In this study we have used MS2-affinity  
106 purification coupled with RNA sequencing (MAPS) to provide a more focussed snapshot of  
107 the RNA interaction partners of the *vigR* 3' UTR. We find that *vigR* 3' UTR interacts with  
108 mRNAs involved in carbon metabolism, amino acid biogenesis, cell wall biogenesis and  
109 virulence. We confirm a direct mRNA-mRNA interaction for the target mRNA *dapE*, a  
110 succinyl-diaminopimelate desuccinylase required for lysine and cell wall peptidoglycan  
111 synthesis. With our earlier finding that the *vigR* 3' UTR up-regulates IsaA, the data suggests  
112 that *vigR* may play a broader role in controlling cell wall metabolism in *S. aureus*. Deletion of  
113 the *vigR* 3' UTR (*vigR*<sup>Δ3'UTR</sup>) significantly increased the virulence of VISA in a wax moth  
114 larvae model of pathogenesis and we find that an *isaA* deletion is completely attenuated.  
115 Sequence analysis of *vigR* from a cross-section of *S. aureus* sequence types indicated that the  
116 *vigR* 3' UTR is highly variable and has expanded through the acquisition of STAR repeats.  
117 We propose that expansion of the 3' UTR may create a binding site for ribonucleases or  
118 RNA-binding proteins that functionalise the UTR. Our study has uncovered an extended

119 regulatory network for the regulatory mRNA *vigR* and reveals a novel pathway of virulence  
120 regulation that is required for *S. aureus* infection.

121

## 122 RESULTS

### 123 The long 3' UTR of *vigR* has expanded through STAR repeats in *S. aureus*

124 In our earlier work, we demonstrated that the long 3' UTR of *vigR* is required for  
125 vancomycin tolerance in the VISA strain JKD6008 (Mediati et al., 2022). To understand if  
126 the *vigR* 3' UTR is broadly conserved in *S. aureus* isolates we examined sequence variation  
127 within the *vigR* mRNA across 58 *S. aureus* genomes that represented a cross-section of  
128 sequence-types and clonal complexes. The 5' and 3' boundaries of *vigR* were previously  
129 defined in our dRNA-seq and Term-seq analyses (Mediati et al., 2022) and were used to  
130 extract *vigR* mRNA sequences with 5' and 3' UTRs. Both the 5' UTR and coding sequence  
131 (CDS) of *vigR* are highly conserved between the 58 *S. aureus* genomes and did not vary in  
132 length except for the *vigR* coding sequence in strains JKD6008 and JKD6009 (423 nt c.f. 378  
133 nt) (**Figure 1A**). In these isogenic strains a SNP has introduced a premature stop codon that  
134 truncates the VigR protein by 15 amino acids (**Figure 1A**). VigR is a hypothetical protein and  
135 it is not clear if the truncated VigR is functional, however these results suggest that *vigR* may  
136 be a pseudogene in JKD6008 and JKD6009, and may partly explain why we did not observe  
137 an antibiotic sensitivity phenotype for the *vigR*<sup>ΔCDS</sup> deletion in our earlier analysis (Mediati et  
138 al., 2022).

139

140 In contrast to the 5' UTR and CDS, the length of the *vigR* 3' UTR varied from 102 – 819 nt  
141 across *S. aureus* genomes (**Supplementary Table 1**). To confirm that the *vigR* 3' UTR varied  
142 between *S. aureus* isolates we performed Northern blot analysis on RNA extracted from  
143 strains USA300 (mRNA=1191 nt), JKD6008 (mRNA=1154 nt), JKD6004 (mRNA=1131 nt)  
144 and Mu50 (mRNA=999 nt) (**Figure 1B** and **Supplementary Figure 1**). In these strains we  
145 verified that the *vigR* mRNA transcript varied in length consistent with the variation  
146 predicted within the 3' UTR from our sequence analysis (**Figure 1A**).

147

148 We next examined the *vigR* 3' UTR to identify sequences that were responsible for  
149 expansion. Alignment and visualisation of 14 *vigR* mRNA sequences that represent the  
150 diversity of 3' UTR lengths indicated that expansion had occurred in two regions (**Figure**  
151 **1A**). The first region encompasses 162 nt at genomic positions 1,850,825 – 1,850,986 nt  
152 (using strain COL as a reference) (compare strains HL1 and M2023, insertion indicated in

153 orange, **Figure 1A**). This site has introduced a mRNA interaction seed region with  
154 complementarity to the target mRNA *folD* (Mediati et al., 2022). The second region spans  
155 genomic positions 1,850,277 – 1,850,705 (in strain COL) and contains the predicted seed for  
156 the target mRNA *isaA* (indicated in blue, **Figure 1A**). This entire region also contains a  
157 repeated sequence that has expanded between *S. aureus* isolates (red, **Figure 1A**).  
158 Examination of the repeated sequences indicated the presence of a previously described  
159 STAR sequence repeat element with the consensus 5' – TNTGTTGNGGCCCN – 3'  
160 (Cramton et al., 2000). Among the genomes analysed, the *vigR* 3' UTR contained 0 – 7  
161 STAR repeats separated by ~40 nt “spacer” sequences.

162

163 The spacer sequences between consecutive STARs are reported to be poorly conserved  
164 compared to the STAR motif (Purves et al., 2012). To better characterise the spacer-STAR  
165 sequences in *S. aureus* strain JKD6008, we used GLAM2 and GLAM2SCAN (Frith et al.,  
166 2008) to identify 101 spacer-STAR repeats throughout the entire JKD6008 genome and  
167 assembled a consensus sequence motif (**Figure 2A** and **Supplementary Table 2**). In line  
168 with previous studies, we find that the STAR motif is well conserved and our analysis  
169 extends the 5' end of the STAR consensus by 4 nt to 5' – TCTNTGTTGNGGCCCN – 3'. In  
170 addition, we find that the 12 nt at the 5' end of the spacer is also well conserved among the  
171 101 spacer-STAR sequences (**Figure 2A**).

172

### 173 **STAR spacer sequences contain a conserved RNA structure**

174 Given the expansion of spacer-STAR repeats in the *vigR* 3' UTR we next asked if spacer-  
175 STAR loci are transcribed in other genomic contexts. Spacer-STAR sequences were mapped  
176 to the *S. aureus* transcriptome, and we found that 24 were within 3' UTRs, 10 within 5'  
177 UTRs, and 17 within predicted sRNAs (defined by SRD, Sassi et al., 2015) (**Supplementary**  
178 **Figure 2A**). The remaining 50/101 were within intergenic regions but not within our  
179 experimentally defined transcriptome boundaries (Mediati et al., 2022). These results indicate  
180 that many spacer-STARs are inserted into UTRs and non-coding sRNAs suggesting that  
181 spacer-STAR sequences may encode a functional RNA.

182

183 To determine if spacer-STARs encode conserved RNA structure, we used CMFinder (Yao et  
184 al., 2006) to identify co-varying nucleotides indicative of conserved structure within our 101  
185 spacer-STAR sequences in *S. aureus* strain JKD6008. Consensus RNA structures and  
186 sequences were analysed for statistically significant covariation using R-scape (Rivas et al.,

187 2020) and visualised using R2R (Weinberg and Breaker, 2011). We identified 5 statistically  
188 significant co-varying bases positioned within a single stem-loop of the spacer-STAR  
189 (**Figure 2B** and **Supplementary Table 3**). This conserved RNA stem-loop structure is  
190 positioned from +960 – 980 nt of the *vigR* 3' UTR in our GLAM2 motif (**Figure 2A**) and  
191 corresponds to the poorly conserved spacer sequence. These data indicate that while there is  
192 low sequence conservation in the spacer, an 8 base-pair long RNA stem-loop structure is  
193 conserved. While not statistically significant (likely due to high sequence conservation), the  
194 conserved 5' spacer and 3' STAR sequences are predicted to form an RNA duplex at the base  
195 of the structure (**Figure 2B**).

196

197 Collectively, these data indicate that the *vigR* 3' UTR has expanded within *S. aureus*  
198 genomes through insertion of a 162 nt sequence and spacer-STAR repeats. While the  
199 sequence of the STAR repeats and 5' end of the spacer are conserved, positions +960 – 980  
200 nt of the spacer encodes an 8 base-pair long RNA stem-loop with variable sequence  
201 suggesting that the RNA structure – rather than the sequence - of the spacer is functionally  
202 important.

203

#### 204 **Spacer-STAR repeats are structured *in vitro***

205 To confirm that the spacer-STAR sequence forms a conserved RNA structure, we used  
206 benzyl cyanide and lead acetate to probe the *in vitro* secondary structure of the *vigR* 3' UTR  
207 from *S. aureus* strain JKD6008 that contains 3 spacer-STAR repeats (**Figure 2C** and  
208 **Supplementary Figure 2B**). Local nucleotide reactivity and flexibility was analysed using  
209 RNAstructure software (Reuter and Mathews, 2010) to predict secondary structure within the  
210 *vigR* 3' UTR. We find that the *vigR* 3' UTR is highly structured and that the third spacer-  
211 STAR repeat (STAR 3) forms the stem-loop structure predicted by sequence co-variation  
212 (**Figure 2B**), albeit with base-pairing between the STAR motif of repeat 2 and 3, rather than  
213 the conserved 5' motif and STAR 3 (shaded blue in **Figure 2C**). The spacer-stem of STAR  
214 repeat 2 is partially retained (+906-919, **Figure 2B**), but appears to have been lost from  
215 STAR repeat 1 in our structure prediction. Overall our *in vitro* structure probing data of *vigR*  
216 3' UTR support formation of at least one spacer-STAR stem-loop structure predicted by  
217 sequence co-variation.

218

219

220

## 221 ***vigR* 3' UTR represses the *dapE* mRNA in vivo**

222 The *vigR* 3' UTR was previously shown to interact with the *fold* and *isaA* mRNAs (Mediati  
223 et al., 2022), the latter encodes a lytic transglycosylase that cleaves the  $\beta$ -1,4-glycosidic  
224 bonding between the *N*-acetylmuramic acid (MurNAc)-*N*-acetylglucosamine (GlcNAc)  
225 residues of cell wall peptidoglycan. While deletion of *isaA* reduced cell wall thickness and  
226 conferred sensitivity to the glycopeptide antibiotic teicoplanin, the *isaA* mutation does not  
227 confer the same vancomycin sensitivity seen in the *vigR* 3' UTR deletion (Mediati et al.,  
228 2022), suggesting that *vigR* may have additional targets in *S. aureus* strain JKD6008. To  
229 identify interaction partners for the *vigR* 3' UTR we used MS2-affinity purification and  
230 sequencing (MAPS) (Lalaouna et al., 2015; Said et al., 2009). The MS2 RNA aptamer was  
231 fused to the 5' end of the *vigR* 3' UTR and placed under the control of the  $P_{xyl/tet}$  promoter of  
232 pRAB11 (Helle et al., 2011). Inducible transcription of MS2-*vigR* 3' UTR was confirmed by  
233 Northern blot, and we find that 15 min of induction with anhydrotetracycline (ATc) leads to  
234 strong accumulation of the MS2 fusion (**Supplementary Figure 3**). The MS2 fusion was  
235 induced in *S. aureus* strain JKD6008 grown in BHI media to an  $OD_{600nm}$  3.0. (mid-log growth  
236 phase). Cells were pelleted and lysed before loading onto an amylose column loaded with  
237 MS2 protein-His-MBP fusion to pull-down the MS2 aptamer. After washing, bound RNAs  
238 were eluted with maltose and precipitated for library preparation and sequencing (Lalaouna et  
239 al., 2015; Mercier et al., 2021). Peaks were called within the sequencing datasets using  
240 blockbuster (Langenberger et al., 2009) and CRAC software (Webb et al., 2014). DESeq2  
241 was used to identify 81 statistically significant peaks enriched in the duplicate MS2-*vigR* 3'  
242 UTR samples compared to MS2-only controls ( $p < 0.01$ ) (**Supplementary Table 4**). Clusters  
243 of orthologous group (COG) analyses for statistically significant transcripts enriched in MS2-  
244 *vigR* 3' UTR MAPS indicated that functional classifications associated with “Carbohydrate  
245 transport and metabolism”, “Amino acid transport and metabolism” and “Cell wall,  
246 membrane and envelope biogenesis” were enriched (adjusted  $p < 0.05$ , **Figure 3A**). To  
247 identify interactions that affect the abundance of target RNAs, we correlated our MAPS  
248 enrichment data with RNA-seq differential expression data from JKD6008 *vigR* <sup>$\Delta$ 3'UTR</sup>  
249 (Mediati et al., 2022). A total of 22 mRNA transcripts were enriched >2-fold by MAPS and  
250 had >2-fold increased expression in the 3' UTR deletion strain (**Figure 3B**, red dotted line),  
251 suggesting that *vigR* 3' UTR may repress these mRNAs through a direct RNA-RNA  
252 interaction.

253



254 We used electrophoretic mobility shift assays (EMSAs) to verify a direct RNA-RNA  
255 interaction *in vitro*. The mRNAs *dapE*, *spn* and *hysA* that represent different levels of  
256 enrichment by MAPS an RNA-seq were *in vitro* transcribed from JKD6008 and incubated  
257 with radiolabelled *vigR* 3' UTR before separation on native 4% TBE PAGE gels. Only the  
258 *dapE* mRNA (SAA6008\_RS11085) was gel shifted by *vigR* 3' UTR and we find that the  
259 complex formed between these long RNAs (657-nt and 1,295-nt, respectively) does not  
260 migrate out of the well (**Figure 4A**, EMSA for *spn* and *hysA* mRNAs in **Supplementary**  
261 **Figure 4A**). To identify the interaction site, we divided the *dapE* mRNA into 3 sub-  
262 fragments and repeated the EMSA (**Supplementary Figure 4B**). The *vigR* 3' UTR was able  
263 to gel shift *dapE* Frag-B (462 nt length) encompassing genomic positions 2,162,029 to  
264 2,162,473 nt (**Figure 4B and Supplementary Figure 4C**). To further narrow down the  
265 interaction site, antisense competitor oligonucleotides (termed 1-4) were tiled across the  
266 interaction site between Frag-B and *vigR* 3'UTR (**Figure 4C-D and Supplementary Figure**  
267 **4D**). The 31-nt antisense oligo 4 was able to compete away *dapE* Frag-B from *vigR* 3' UTR  
268 (**Figure 4C**). This site contains a predicted 28 base-pair interaction between *dapE* and *vigR*  
269 3' UTR, with 22-nt of complementarity (**Figure 4E**). Notably, the *dapE* seed sequence  
270 (+1066–1094 nts) partially overlaps the *isaA* mRNA seed region at +984 – 1069 (**Figure**  
271 **2C**)(Mediati et al., 2022). This data suggests that this region within the *vigR* 3' UTR can  
272 base-pair with multiple RNA targets.

273

274 To verify that the interaction between *vigR* 3' UTR and *dapE* mRNA is functional, we  
275 overexpressed *vigR* 3' UTR from the P<sub>*urfA*</sub> promoter of pICS3 (Ivain et al., 2017) and assessed  
276 *dapE* mRNA abundance using qRT-PCR (**Figure 4F**). Consistent with our earlier RNA-seq  
277 analysis, we find that *dapE* is 6.1-fold repressed by the *vigR* 3' UTR ( $p=0.0026$ ,  $n=4$ , **Figure**  
278 **4F**).

279

280 Collectively, these data indicate that the *vigR* 3' UTR represses *dapE* through a direct base-  
281 pair interaction with the coding sequence of the mRNA. DapE encodes succinyl-  
282 diaminopimelate desuccinylase that is required for lysine and peptidoglycan synthesis (Born  
283 and Blanchard, 1999) and our results indicate that in addition to activation of the cell wall  
284 lytic transglycosylase *isaA*, *vigR* represses *dapE* that contributes to cell wall biosynthesis.

285

286 **The *vigR* 3 UTR is required for vancomycin tolerance and virulence in a wax moth**  
287 **larvae model of infection**

288 Intermediate-vancomycin resistance in *S. aureus* isolates has been correlated with a decrease  
289 in virulence in both murine bacteraemia and wax moth larvae models of infection (Cameron  
290 et al., 2017; Jin et al., 2020). We next asked if the decreased vancomycin tolerance of our  
291 *vigR*<sup>Δ3'UTR</sup> strain also results in increased virulence in a wax moth larvae model of infection.  
292 We infected larvae (*n*=20) with 10 μL of 10<sup>7</sup> CFU/ml of VISA strain JKD6008 (isogenic  
293 parent), the *vigR*<sup>Δ3'UTR</sup> strain, and marker rescue strain *vigR*<sup>Δ3'UTR</sup>-repair (*vigR*<sup>Δ3'UTR::3'UTR</sup>)  
294 where the wild-type 3' UTR sequence has been restored. We also included the vancomycin-  
295 sensitive (VSSA) strain JKD6009 that is the parent strain of JKD6008 (Howden et al., 2010).  
296 Infected larvae were monitored for 6 days for melanisation and death. Consistent with earlier  
297 studies (Cameron et al., 2017; Jin et al., 2020), we find that the VSSA strain JKD6009 is  
298 significantly more virulent than the VISA derivative JKD6008 (*p*=0.0001, **Figure 5A**).  
299 Deletion of the *vigR* 3' UTR significantly increased the virulence of JKD6008 (*p*=0.031), and  
300 wild-type virulence was restored in the *vigR*<sup>Δ3'UTR</sup>-repaired strain (**Figure 5A**). This result  
301 indicates that the 3' UTR of *vigR* contributes to both the reduced virulence and vancomycin  
302 intermediate resistance of VISA strain JKD6008.

303

304 To understand whether the *vigR* 3' UTR contributes to vancomycin tolerance during  
305 infection, we treated larvae with 10mg/kg of vancomycin directly after injection with VISA  
306 JKD6008 or the *vigR*<sup>Δ3'UTR</sup> strain (**Figure 5B**). Consistent with *in vitro* results, treatment with  
307 vancomycin did not significantly affect the virulence of the vancomycin-intermediate strain  
308 JKD6008. However, vancomycin treatment significantly reduced killing in the *vigR*<sup>Δ3'UTR</sup>  
309 strain and reduced virulence to wild-type levels (*p*=0.022, **Figure 5B**). The addition of  
310 10mg/kg of vancomycin delayed complete killing of larvae infected with VSSA isolate  
311 JKD6009 by 1-day and did not significantly affect pathogenesis (**Supplementary Figure 5**).  
312 These results indicate that the 3' UTR of *vigR* is required for intermediate vancomycin  
313 resistance in VISA during infection.

314

315 We had previously shown that the 3' UTR of *vigR* up-regulates the cell wall lytic  
316 transglycosylase *isaA* that contributes to cell wall thickening in VISA JKD6008 (Mediati et  
317 al., 2022). We additionally infected larvae with the JKD6008 *ΔisaA* strain to determine if  
318 *vigR* 3' UTR regulation of *isaA* contributes to the virulence phenotype. In contrast to the *vigR*  
319 3' UTR, deletion of *isaA* completely attenuated JKD6008 (*p*=0.0036, **Figure 5A**). Our results  
320 demonstrate that while deletion of *isaA* reduces cell wall thickness comparable to the virulent  
321 VSSA strain JKD6009, virulence is not restored to VSSA levels in the *ΔisaA* background.

322 Our data indicate that the cell wall lytic transglycosylase IsaA plays a critical role in *S.*  
323 *aureus* infection.

324

## 325 **DISCUSSION**

326 In earlier work, the regulatory 3' UTR of *vigR* mRNA was found to control vancomycin  
327 tolerance and upregulate the lytic transglycosylase *isaA* (Mediati et al., 2022). Using MS2-  
328 affinity purification and RNA sequencing, we demonstrate that the *vigR* 3' UTR also  
329 represses *dapE*, a succinyl-diaminopimelate desuccinylase that is required for lysine and  
330 peptidoglycan synthesis (Gillner et al., 2013). Our results suggest that the *vigR* 3' UTR may  
331 play a broader role in controlling cell wall metabolism in *S. aureus* and we demonstrate that  
332 the *vigR* 3' UTR also contributes to the attenuated virulence of the vancomycin-intermediate  
333 isolate. Surprisingly, we find that *isaA* is not required for growth *in vitro*, but the  $\Delta isaA$  strain  
334 is completely attenuated in a wax moth larvae model of pathogenesis.

335

336 Sequence analysis of *vigR* indicated that the 5' UTR and CDS are highly conserved. In  
337 contrast, the 3' UTR is highly variable and appears to expand through the acquisition of  
338 STAR repeats (Cramton et al., 2000). Here we have extended the reported 14-nt STAR repeat  
339 sequence to include a conserved 5' 4-nt TCTN and we find that while the ~40 nt variable  
340 spacers do not have conserved sequence, they form an evolutionary conserved RNA stem-  
341 loop structure suggesting that the structure of the spacer region is functional. Our *in vitro*  
342 structure probing data supports the formation of an RNA stem in the spacer region.

343

344 It is not yet clear how the spacer-STAR elements influence the function of the *vigR* 3' UTR,  
345 but it is notable that repeat elements have previously been linked to mRNA stability in  
346 bacteria and eukaryotes (Chan et al., 2022; De Gregorio et al., 2002; De Gregorio et al., 2005;  
347 De Gregorio et al., 2006; Knutsen et al., 2006; Maquat, 2020; Menendez-Gil et al., 2020).  
348 Sequence repeats termed SINE elements (notably *Alu* elements in humans) are known to  
349 modulate RNA-RNA and RNA-protein interactions when inserted into eukaryotic 3' UTRs  
350 (Chan et al., 2022; Maquat, 2020). *Alu* elements in 3' UTRs are reported to provide  
351 interaction sites for the dsRNA ribonuclease Staufen (Gong and Maquat, 2011; Lucas et al.,  
352 2018). In a mechanism that may functionally parallel our observations with *vigR*, 3' UTR-  
353 encoded *Alu* repeats facilitate interactions with *Alu*-encoding long non-coding RNAs  
354 (lncRNAs) (Gong and Maquat, 2011). Imperfect base-pairing of the 3' UTR and lncRNA  
355 recruits Staufen, triggering Staufen-mediated decay and repression of the mRNA target. The

356 *isaA* interacting nucleotides in *vigR* partially overlap STAR repeat 3 of *vigR* indicating that  
357 this interaction is partly driven by acquisition of the STAR repeat. By analogy, the imperfect  
358 base-pairing between the *vigR* STAR repeats and mRNA targets may create a binding site for  
359 ribonucleases or recruit RNA binding proteins.

360

361 In our previous work we postulated that the *vigR* 3' UTR interactions with *isaA* and *fold*  
362 mRNAs may occlude an RNase cleavage site to stabilise the transcripts. This is in line with  
363 previous work showing that the regulatory mRNA-mRNA interactions between *hyl-prsA* and  
364 *irvA-gbpC* stabilise their targets by occluding interactions with RNase J1 (Ignatov et al.,  
365 2020; Liu et al., 2015). Here we find that *vigR* represses *dapE*, suggesting a mechanism  
366 where the *vigR-dapE* interaction may create an RNase targeting site, although we have not  
367 identified the RNase responsible. To our knowledge, this is the first repressive regulatory  
368 mRNA-mRNA interaction identified in bacteria and indicates that these interactions can have  
369 both activating and repressing regulatory outcomes.

370

371 By intersecting RNA-seq and MAPS data we have uncovered a functional interaction  
372 between *dapE* mRNA and the *vigR* 3' UTR. DapE is a succinyl-diaminopimelate  
373 desuccinylase that is required for lysine and peptidoglycan synthesis (Gillner et al., 2013).  
374 Repression of *dapE* and activation of *isaA* expression (a cell wall autolysin) suggests that  
375 *vigR* upregulation coordinates a reduction in cell wall peptidoglycan crosslinking. Lysine is  
376 required for transpeptidation of peptidoglycan in *S. aureus*, and IsaA cleaves the glycosidic  
377 bonds between the MurNAc and GlcNAc sugars within peptidoglycan strands. This  
378 coordinated reduction in peptidoglycan crosslinking would be consistent with the reduced  
379 cell wall crosslinking that is observed in VISA strains (Howden et al., 2010).

380

381 Cell wall thickening and reduced crosslinking is thought to contribute to vancomycin  
382 tolerance in VISA strains however, these strains are generally less virulent in wax moth and  
383 mouse models of infection (Cameron et al., 2017; Jin et al., 2020). We have confirmed this  
384 phenotype for VISA JKD6008 and found that upregulation of *vigR* in the VISA strain  
385 partially contributes to both vancomycin tolerance *in vivo*, and to the reduced virulence  
386 phenotype. To our surprise, deletion of the lytic transglycosylase *isaA* completely attenuated  
387 virulence in the wax moth model. Previous studies have demonstrated that passive  
388 immunisation with IsaA-targeting IgG (Lorenz et al. 2011) can reduce mortality in a mouse  
389 model of infection, indicating that IsaA is presented on the surface of the cell during

390 infection, and our data suggest that IsaA may also contribute to virulence in VISA strain  
391 JKD6008, although the mechanism remains unclear. Cell wall metabolism appears to change  
392 during infections and the ability to crosslink and cleave peptidoglycan plays an important role  
393 in virulence (Sutton et al., 2021). The glucosaminidase SagB (that cleaves peptidoglycan) is  
394 required for virulence in a mouse model of infection although the precise mechanism is also  
395 unknown (Sutton et al., 2021). The cell wall autolysin LytM is required for release of Protein  
396 A in *S. aureus*, linking cell wall hydrolysis to virulence (Becker et al., 2014) and suggesting a  
397 potential mechanism for  $\Delta isaA$  attenuation - through release of virulence factors at the cell  
398 surface.

399

400 Collectively, our data indicates that the long 3' UTR of *vigR* has been functionalised by the  
401 acquisition of STAR sequence repeats that encode structured RNA. The JKD6008 genome  
402 encodes at least 101 STAR repeats and based on our earlier mapping of transcript boundaries  
403 (Mediati et al., 2022), we predict that 51 of these are transcribed (data not shown). Within the  
404 context of the *vigR* 3' UTR, the STAR repeat facilitates interactions with both *dapE* and *isaA*  
405 mRNAs that is predicted to reduce cell wall peptidoglycan crosslinking. The *vigR* 3' UTR  
406 reduces virulence in a wax moth model of infection, consistent with the VISA phenotype –  
407 but this does not appear to be dependent on up-regulation of *isaA* that is required for larvae  
408 killing. Our results support a broader role for *vigR* 3' UTR in regulation of cell wall  
409 metabolism that contributes to both vancomycin tolerance and reduced virulence in VISA.

410

## 411 **METHODS**

412 **Bacterial strains and general culture conditions.** The bacterial strains, plasmids and  
413 oligonucleotides used in this study are listed in **Supplementary Table 5**. *S. aureus* strains  
414 RN4220, USA300, Mu50, JKD6004 and the JKD6009/JKD6008 (VSSA/VISA) pair were  
415 routinely cultured at 37°C on solid or in liquid brain heart infusion (BHI, Merck) or Mueller-  
416 Hinton (MH, Merck) media. Antibiotics were used in this study to select for plasmids in *S.*  
417 *aureus* at 15 µg/mL chloramphenicol, unless otherwise specified. *E. coli* DH5a and IM08B  
418 strains were cultured at 37°C on solid or in liquid Luria-Bertani (LB) media. Antibiotics were  
419 used to select for plasmids in *E. coli* at 100 µg/mL ampicillin or 15 µg/mL chloramphenicol,  
420 unless otherwise specified. All bacterial strains were stored at -80°C as stationary phase  
421 cultures with 16% (v/v) glycerol.

422

423 **Strain modifications and plasmids.** *S. aureus* MS2-affinity tagged constructs were  
424 constructed in the anhydrotetracycline (ATc) inducible P<sub>xyl/tet</sub> pRAB11 vector system (Helle  
425 et al., 2011). The *vigR* 3' UTR sequence was amplified from JKD6009 using Phusion Hot  
426 Start Polymerase (NEB) with primers incorporating the MS2 aptamer sequence (fused to 5'  
427 end of *vigR* 3' UTR) and the *rrn1* T7 terminator (**Supplementary Table 5**). The MS2-*vigR*  
428 3' UTR and MS2 products were cloned into pRAB11 at the KpnI and EcoRI sites using 10 U  
429 of T4 DNA ligase (Thermo) and transformed into chemically-competent *E. coli* DH5 $\alpha$ .  
430 Antibiotics were used to select for pRAB11 in *E. coli* at 100  $\mu$ g/mL ampicillin. Constructs  
431 were confirmed by Sanger sequencing, transformed into electrocompetent *E. coli* IM08B and  
432 then transformed into electrocompetent *S. aureus* JKD6009 *vigR* <sup>$\Delta$ 3'UTR</sup> (Mediati et al., 2022).  
433 Antibiotics were used to select for pRAB11 in *S. aureus* at 15  $\mu$ g/mL chloramphenicol.  
434 Construction of the *S. aureus* JKD6009 *vigR* <sup>$\Delta$ 3'UTR</sup>, JKD6009 pICS3::*vigR*, JKD6008  
435 *vigR* <sup>$\Delta$ 3'UTR</sup>, JKD6008 *vigR* <sup>$\Delta$ 3'UTR</sup>-repair, JKD6008  $\Delta$ *isaA* strains were described previously in  
436 Mediati et al., 2022.

437  
438 ***vigR* conservation analysis.** The mRNA transcriptional boundary of *vigR* in *S. aureus* strain  
439 JKD6009 was determined from our previous work using dRNA-seq, Term-seq and Northern  
440 blot (Mediati et al., 2022). These boundary nucleotides were used to define and extract the  
441 *vigR* mRNA sequence from 58 genomes of *S. aureus* isolates. The 5' UTR, CDS and 3' UTR  
442 sequence length, number of STAR repeats, and presence or absence of the *fold* or *isaA*  
443 mRNA interaction seed region in each isolate were determined individually and used to  
444 construct **Supplementary Table 1**. From these 58 genomes, 14 representative strains were  
445 selected that demonstrated *vigR* transcript variation. The GenBank and blastn.out files from  
446 these 14 representative strains were used as input into Easyfig (Sullivan et al., 2011) to  
447 generate **Figure 1A**.

448  
449 **Northern blot.** Total RNA was purified using the GTC-phenol:chloroform extraction method  
450 as performed previously for *S. aureus* (Mediati et al., 2022). At least 5  $\mu$ g of RNA was  
451 treated with a 5:1 ratio of glyoxal denaturation mixture for 1 h at 55°C. Denatured RNA was  
452 resolved on a 1% BPTE-agarose gel containing SYBR Green (Thermo) and run for ~1 h at  
453 100 V in 1x BPTE buffer. Intact 23S and 16S ribosomal RNA was confirmed on a Bio-Rad  
454 Chemi-doc and washed consecutively in 200 mL of 75 mM NaOH, 200 mL of neutralizing  
455 solution (1.5 M NaCl and 500 mM Tris-HCl, pH 7.5) and 200 mL of SSC buffer (3 M NaCl

456 and 300 mM sodium citrate, pH 7.0) for 20 min each. RNA was capillary transferred onto a  
457 Hybond-N+ nylon membrane (GE Healthcare) and UV-crosslinked in a Stratagene Auto-  
458 Crosslinker with 1200 mJ dosage of UV-C. The membrane was equilibrated in Ambion  
459 ULTRAhyb hybridization buffer (Thermo) for 1 h at 42°C and then incubated with 10 pMol  
460 of 20 µCi  $\gamma^{32}\text{P}$ -ATP-labelled oligonucleotide probe (**Supplementary Table 5**) for 16 h at  
461 42°C. Membranes were washed three times in 2x sodium chloride sodium phosphate EDTA  
462 (SSPE) buffer with the addition of 0.1% SDS for 20 min at 42°C. The blot was imaged using  
463 a BAS-MP 2040 phosphorscreen on a FLA9500 Typhoon (GE Healthcare). ImageJ software  
464 (Schindelin et al., 2012) was used to align the SYBR stained gel and membrane, and used to  
465 construct **Figure 1B**.

466

467 ***In silico* RNA structure prediction.** The STAR sequence repeats, as defined previously by  
468 (Purves et al., 2012) (5' – TNTGTTGNGGCCCN), and the upstream 50 nt within JKD60008  
469 were extrapolated and used as input into the GLAM2 software (Frith et al., 2008) to generate  
470 the consensus Spacer-STAR sequence motif in **Figure 2A**. GLAM2 was used with the  
471 gapless Gibbs sampling parameter and accommodates short sequence gaps. This consensus  
472 Spacer-STAR motif was inserted into GLAM2SCAN (Frith et al., 2008) and used to identify  
473 related sequences within the JKD6008 genome. The transcriptional boundaries as identified  
474 previously using dRNA-seq and Term-seq (Mediati et al., 2022) were then used to determine  
475 the genomic features (e.g., UTRs, CDS or sRNA) that each Spacer-STAR sequence is  
476 positioned in. These 101 Spacer-STAR sequences defined by GLAM2SCAN were then used  
477 as input into CMfinder software (Yao et al., 2006) and used to construct the *in silico*  
478 consensus RNA secondary structure model in **Figure 2B** using the covariance model  
479 expectation maximisation algorithm. The R-scape software program (Rivas et al., 2020) was  
480 used to assess statistical significance of the co-varying base pairs.

481

482 ***In vitro* structure of *vigR* 3' UTR.** Purified *vigR* 3' UTR amplified from JKD6008 was *in*  
483 *vitro* transcribed (IVT) using HiScribe T7 RNA polymerase (NEB). RNA products were  
484 DNase I treated (NEB) for 30 mins at 37°C, phenol-chloroform extracted, ethanol  
485 precipitated, and then separated on a 4% polyacrylamide TBE-6M urea gel. Products were  
486 excised, crushed, and incubated in 500 µL gel elution buffer (10 mM magnesium acetate, 0.5  
487 M ammonium acetate, 1 mM EDTA) with gentle rotation for 16 h at 4°C. RNA was extracted  
488 from the eluate using phenol-chloroform and ethanol precipitation. Approx. 5 pMol of

489 purified *vigR* 3' UTR RNA was renatured by heating to 90°C for 2 min, placed on ice for 2  
490 min, and then incubated in folding buffer (300 mM HEPES (pH 8.0), 20 mM MgCl<sub>2</sub> and 300  
491 mM NaCl) for 1 h at 37°C. RNA was then chemically modified with 10, 50 and 100 mM of  
492 benzoyl cyanide (Sigma) for 1 min at 20°C. RNA species were also modified with 10 mM  
493 lead acetate (Sigma) for 1 min at 25°C. As a no-modification control, DMSO (Sigma) was  
494 added to the RNA and incubated for 1 min at 20°C. RNA species were ethanol precipitated  
495 and reverse transcribed using SuperScript IV (Thermo) with purified 30 µCi <sup>32</sup>P-ATP-labeled  
496 oligonucleotides spanning the entire *vigR* 3' UTR (**Supplementary Figure 2B** and  
497 **Supplementary Table 5**). In parallel, single ddNTP (Roche) sequencing reactions were  
498 performed with identical 30 µCi <sup>32</sup>P-ATP-labeled oligonucleotides and 2 pMol of RNA. The  
499 cDNA products were incubated with 200 mM NaOH at 80°C to hydrolyse template RNA and  
500 inactivate SuperScript IV enzyme. Products were separated on a 6% polyacrylamide TBE-6M  
501 urea gel for 100 min at a maximum of 50 W (**Supplementary Figure 2B**). Gels were then  
502 dried and visualised using a Fuji BAS-MP 2040 phosphorscreen and Typhoon FLA9500.  
503 Nucleotide reactivity was analysed and RNAstructure (Reuter and Mathews, 2010) was used  
504 to construct the secondary structure model in **Figure 2C**.

505  
506 **MS2-affinity purification and RNA-sequencing (MAPS).** JKD6009 *vigR*<sup>Δ3'UTR</sup> transformed  
507 with pRAB11::MS2-*vigR*<sup>3'UTR</sup> and pRAB11::MS2 (MS2 tag only control) were grown in BHI  
508 media supplemented with 15 µg/mL chloramphenicol at 37°C with 180 rpm shaking to an  
509 OD<sub>600nm</sub> 3.0. Constructs were then induced with 0.4 µM ATc and grown for a further 15 min  
510 at 37°C with shaking. Cultures were harvested by centrifugation at 4°C and crude extracts (5  
511 µg) were probed for the MS2 aptamer sequence. MS2-affinity purifications were performed  
512 in biological duplicates and as previously described (Lalaouna et al., 2015; Mercier et al.,  
513 2021). RNA quality was assessed on a PicoRNA Bioanalyzer 2100 chip and underwent  
514 ribosomal RNA depletion using QIAseq FastSelect (Qiagen). Sequencing libraries were  
515 constructed using the NEBNext II directional RNA library kit for Illumina sequencing (NEB)  
516 and sequenced on a NextSeq2000 platform at the Epitranscriptomics and RNA-sequencing  
517 facility, Université de Lorraine-CNRS-INSERM (Nancy, France) generating 50 bp single-end  
518 reads.

519  
520 **Analysis of enriched nucleotide peak data.** MAPS data were analysed using the pipeline  
521 previously described for CRAC data analysis (Sy et al., 2018) using the ruffus pipeline



522 CRAC\_pipeline\_SE.py that performs alignment and read counting steps  
523 ([https://git.ecdf.ed.ac.uk/sgrannem/crac\\_pipelines](https://git.ecdf.ed.ac.uk/sgrannem/crac_pipelines)). Binding sites were identified using  
524 blockbuster as described previously in Sy et al., 2018 and adapted from Holmqvist et al.,  
525 2016. Briefly, GTF format outputs from the ruffus CRAC pipeline were converted to BED  
526 format using pyGTF2bed.py (Webb et al., 2014). The experimental replicates were combined  
527 and sorted before peak calling. Peaks were defined using blockbuster with settings: -  
528 minBlockHeight 50 -distance 1. Peak intervals defined by blockbuster were used to calculate  
529 statistically enriched regions of the transcriptome. Read depth at peak intervals was  
530 calculated for each experimental and control replicate using HTSeq (Anders et al., 2015), and  
531 enriched peaks identified using DESeq2 (Love et al., 2014).

532  
533 **RNA-RNA electrophoretic mobility shift assay (EMSA).** Full-length or sub-fragments of  
534 *dapE* (SAA6008\_RS11085), *spn* (SAA6008\_RS02260), *hysA* (SAA6008\_RS12255) and  
535 *vigR* 3' UTR from JKD6008 were *in vitro* transcribed (IVT) using HiScribe T7 RNA  
536 polymerase (NEB). IVT products were RQ1 DNase treated (Promega) for 15 mins at 37°C,  
537 phenol-chloroform extracted and ethanol precipitated, and then separated on a 5%  
538 polyacrylamide TBE-6M urea gel. Products were excised, crushed, and incubated in 500 µL  
539 RNA gel elution buffer (10 mM magnesium acetate, 0.5 M ammonium acetate, 1 mM EDTA)  
540 for 16 hours at 4°C. RNA was extracted from the eluate using phenol-chloroform extraction  
541 and ethanol precipitation. Approximately 50 pM of *vigR* 3' UTR RNA was dephosphorylated  
542 using quick calf intestinal alkaline phosphatase (CIP, Thermo), then extracted using phenol-  
543 chloroform and ethanol precipitation. The 5' ends were radiolabelled with 20 µCi  $\gamma^{32}\text{P}$ -ATP  
544 using T4 polynucleotide kinase (NEB) and separated from free nucleotides using a MicroSpin  
545 G-50 column (Cytiva), and then purified on denaturing PAGE as above. To analyse *vigR* 3'  
546 UTR binding to full-length or sub-fragments of *dapE*, increasing excess amounts of the *dapE*  
547 RNAs were annealed to 50 fM of radiolabelled *vigR* 3' UTR in 1x duplex buffer (40 mM  
548 Tris-acetate, 0.5 mM magnesium acetate, 100 mM NaCl) in a 10 µL reaction. These were  
549 incubated at 95°C for 5 minutes, then at 37°C for 2 hours. Samples were run on a 4%  
550 polyacrylamide 0.5X TBE gel containing 5% glycerol for ~4 h at a maximum of 16V/cm or  
551 1.33 mA/cm. Gels were then dried and visualised using a Fuji BAS-MP 2040 phosphorscreen  
552 and Typhoon FLA9500. Where appropriate 1.25 µM of antisense competitor oligonucleotides  
553 (**Supplementary Table 5**) were added to compete away radiolabeled *vigR* 3' UTR at a  
554 concentration excess of 500x. RNA was annealed, run and visualised as above.

555

556 **Quantitative real-time PCR (qRT-PCR).** JKD6009 pICS3 or pICS3::*vigR* (Mediati et al.,  
557 2022) overnight cultures were diluted 1:100 into 10 mL fresh liquid BHI and grown at 37°C  
558 with 200 rpm shaking to OD<sub>600nm</sub> 3.0. Cells were harvested by spinning at 3,800 g for 10 min  
559 at 4°C. A total of 5 U of recombinant RNasin (Promega) and 10 U of RQ1 RNase-free DNase  
560 (Promega) was added and RNA purified using the GTC-phenol:chloroform extraction  
561 procedure as previously described for *S. aureus* in Mediati et al., 2022. At least 1 µg of RNA  
562 was reverse-transcribed using SuperScript IV (Thermo). qRT-PCR was performed on a  
563 RotorGene Q (Eppendorf) using SensiFAST SYBR Hi-ROX (Bioline). A total cDNA  
564 concentration of 100 ng in combination with 200 nM of *dapE* oligonucleotide per reaction  
565 (**Supplementary Table 5**) resulted in ideal Ct values of between 8-12. The Ct values per  
566 reaction were calculated using the RotorGene Q analysis software (Qiagen). Relative gene  
567 expression was determined using  $\Delta\Delta C_t$  abundance of the *gapA* (SAA6008\_RS08745,  
568 glyceraldehyde-3-phosphate dehydrogenase) transcript as a reference control.

569

570 ***Galleria mellonella* infection assay.** The *G. mellonella* infection assay was performed as  
571 previously described (Frei et al., 2021). Briefly, *G. mellonella* larvae (230-250 mg) were  
572 injected with 10<sup>7</sup> bacterial cells of each *S. aureus* construct (JKD6009, JKD6008 (isogenic  
573 parent), *vigR*<sup>Δ3'UTR</sup>, *vigR*<sup>Δ3'UTR</sup>-repair and *ΔisaA*) and a PBS control into the last right proleg  
574 using a 100 µL syringe (Hamilton Ltd). PBS-injected larvae resulted in no killing. The assay  
575 was done with 4 replicates using 5 larvae per replicate (*n*=20). Following infection, the larvae  
576 were incubated at 37°C for 6 consecutive days and monitored every 24 h for health and  
577 survival according to the *G. mellonella* Health Index Scoring System (Tsai et al., 2016). To  
578 examine vancomycin tolerance in JKD6009, JKD6008 and *vigR*<sup>Δ3'UTR</sup> strains, larvae (230-250  
579 mg) were infected with 10<sup>7</sup> bacterial cells and incubated at 37°C for 1 h. Either vancomycin  
580 (10 mg/kg) or distilled water was injected into the infected larvae and treated as above. The  
581 assay was performed with 2 replicates using 10 larvae per treatment for each replicate (*n*=20).

582

## 583 **ACKNOWLEDGEMENTS**

584 The pICS3 vector was a generous gift from Brice Felden (Université de Rennes). The authors  
585 thank Ian Monk for insightful discussions of *S. aureus* phylogenetics. DGM and JJT are  
586 supported by grants from the National Health and Medical Research Council (NHMRC,  
587 GNT1139313) and the Australian Research Council (ARC, DP220101938). This project

588 received funding from the European Union’s H2020 research and innovation programme  
589 under Grant Agreement No. 753137. This work of the Interdisciplinary Thematic Institute  
590 IMCBio, as part of the ITI 2021-2028 program of the University of Strasbourg, CNRS and  
591 Inserm, was supported by IdEx Unistra (ANR-10-IDEX-0002), and by SFRI-STRAT’US  
592 project (ANR 20-SFRI-0012) and EUR IMCBio (ANR-17-EURE-0023) under the  
593 framework of the French Investments for the Future Program.

594

## 595 REFERENCES

- 596 1. Anders, S., Pyl, P.T., and Huber, W. (2015). HTSeq – A Python framework to work  
597 with high-throughput sequencing data. *Bioinformatics* 31, 166-169.
- 598 2. Bandyra, K.J., Said, N., Pfeiffer, V., Gorna, M.W., Vogel, J., and Luisi, B.F. (2012).  
599 The seed region of a small RNA drives the controlled destruction of the target mRNA  
600 by the endoribonuclease RNase E. *Mol Cell* 47, 943-953.
- 601 3. Becker, S., Frankel, M.B., Schneewind, O., and Missiakas, D. (2014). Release of  
602 protein A from the cell wall of *Staphylococcus aureus*. *Proc Natl Acad Sci U S A* 111,  
603 1574-1579.
- 604 4. Born, T.L., and Blanchard, J.S. (1999). Structure/function studies on enzymes in the  
605 diaminopimelate pathway of bacterial cell wall biosynthesis. *Curr Opin Chem Biol* 3,  
606 607-613.
- 607 5. Bouvier, M., Sharma, C.M., Mika, F., Nierhaus, K.H., and Vogel, J. (2008). Small  
608 RNA binding to 5' mRNA coding region inhibits translational initiation. *Mol Cell* 32,  
609 827-837.
- 610 6. Cameron, D.R., Lin, Y.H., Trouillet-Assant, S., Tafani, V., Kostoulas, X.,  
611 Mouhtouris, E., Skinner, N., Visvanathan, K., Baines, S.L., Howden, B., *et al.* (2017).  
612 Vancomycin-intermediate *Staphylococcus aureus* isolates are attenuated for virulence  
613 when compared with susceptible progenitors. *Clin Microbiol Infect* 23, 767-773.
- 614 7. Chabelskaya, S., Gaillot, O., and Felden, B. (2010). A *Staphylococcus aureus* small  
615 RNA is required for bacterial virulence and regulates the expression of an immune-  
616 evasion molecule. *PLoS Pathog* 6, e1000927.
- 617 8. Chan, J.J., Tabatabaieian, H., and Tay, Y. (2022). 3'UTR heterogeneity and cancer  
618 progression. *Trends Cell Biol.*
- 619 9. Cramton, S.E., Schnell, N.F., Gotz, F., and Bruckner, R. (2000). Identification of a  
620 new repetitive element in *Staphylococcus aureus*. *Infect Immun* 68, 2344-2348.
- 621 10. Das, S., Lindemann, C., Young, B.C., Muller, J., Osterreich, B., Ternette, N.,  
622 Winkler, A.C., Paprotka, K., Reinhardt, R., Forstner, K.U., *et al.* (2016). Natural  
623 mutations in a *Staphylococcus aureus* virulence regulator attenuate cytotoxicity but  
624 permit bacteremia and abscess formation. *Proc Natl Acad Sci U S A* 113, E3101-  
625 3110.
- 626 11. De Gregorio, E., Abrescia, C., Carlomagno, M.S., and Di Nocera, P.P. (2002). The  
627 abundant class of nemis repeats provides RNA substrates for ribonuclease III in  
628 *Neisseriae*. *Biochim Biophys Acta* 1576, 39-44.

- 629 12. De Gregorio, E., Silvestro, G., Petrillo, M., Carlomagno, M.S., and Di Nocera, P.P.  
630 (2005). Enterobacterial repetitive intergenic consensus sequence repeats in Yersinia:  
631 genomic organization and functional properties. *J Bacteriol* *187*, 7945-7954.
- 632 13. De Gregorio, E., Silvestro, G., Venditti, R., Carlomagno, M.S., and Di Nocera, P.P.  
633 (2006). Structural organization and functional properties of miniature DNA insertion  
634 sequences in Yersinia. *J Bacteriol* *188*, 7876-7884.
- 635 14. Durica-Mitic, S., Gopel, Y., and Gorke, B. (2018). Carbohydrate Utilization in  
636 Bacteria: Making the Most Out of Sugars with the Help of Small Regulatory RNAs.  
637 *Microbiol Spectr* *6*(2).
- 638 15. Frei, A., King, AP., Lowe, G.J., Cain, A.K., Short, F.L., Dinh, H., Elliott, A.G.,  
639 Zuegg, J., Wilson, J.J., Blaskovich, M.A.T. (2021). Nontoxic cobalt(III) schiff base  
640 complexes with broad-spectrum antifungal activity. *Chemistry*. *26*;27(6):2021-2029.
- 641 16. Frith, M.C., Saunders, N.F., Kobe, B., and Bailey, T.L. (2008). Discovering sequence  
642 motifs with arbitrary insertions and deletions. *PLoS Comput Biol* *4*, e1000071.
- 643 17. Gillner, D.M., Becker, D.P., and Holz, R.C. (2013). Lysine biosynthesis in bacteria: a  
644 metallodesuccinylase as a potential antimicrobial target. *J Biol Inorg Chem* *18*, 155-  
645 163.
- 646 18. Gong, C., and Maquat, L.E. (2011). lncRNAs transactivate STAU1-mediated mRNA  
647 decay by duplexing with 3' UTRs via Alu elements. *Nature* *470*, 284-288.
- 648 19. Helle, L., Kull, M., Mayer, S., Marincola, G., Zelder, M.E., Goerke, C., Wolz, C., and  
649 Bertram, R. (2011). Vectors for improved Tet repressor-dependent gradual gene  
650 induction or silencing in *Staphylococcus aureus*. *Microbiology (Reading)* *157*, 3314-  
651 3323.
- 652 20. Holmqvist, E., Wright, P.R., Li, L., Bischler, T., Barquist, L., Reinhardt, R.,  
653 Backofen, R., and Vogel, J. (2016). Global RNA recognition patterns of post-  
654 transcriptional regulators Hfq and CsrA revealed by UV crosslinking *in vivo*. *EMBO J*  
655 *35*, 991-1011.
- 656 21. Howden, B.P., Davies, J.K., Johnson, P.D., Stinear, T.P., and Grayson, M.L. (2010).  
657 Reduced vancomycin susceptibility in *Staphylococcus aureus*, including vancomycin-  
658 intermediate and heterogeneous vancomycin-intermediate strains: resistance  
659 mechanisms, laboratory detection, and clinical implications. *Clin Microbiol Rev* *23*,  
660 99-139.
- 661 22. Ignatov, D., Vaitkevicius, K., Durand, S., Cahoon, L., Sandberg, S.S., Liu, X.,  
662 Kallipolitis, B.H., Ryden, P., Freitag, N., Condon, C., *et al.* (2020). An mRNA-  
663 mRNA Interaction Couples Expression of a Virulence Factor and Its Chaperone in  
664 *Listeria monocytogenes*. *Cell Rep* *30*, 4027-4040 e4027.
- 665 23. Ivain, L., Bordeau, V., Eyraud, A., Hallier, M., Dreano, S., Tattevin, P., Felden, B.,  
666 and Chabelskaya, S. (2017). An *in vivo* reporter assay for sRNA-directed gene control  
667 in Gram-positive bacteria: identifying a novel sRNA target in *Staphylococcus aureus*.  
668 *Nucleic Acids Res* *45*, 4994-5007.
- 669 24. Jagodnik, J., Chiaruttini, C., and Guillier, M. (2017). Stem-Loop Structures within  
670 mRNA Coding Sequences Activate Translation Initiation and Mediate Control by  
671 Small Regulatory RNAs. *Mol Cell* *68*, 158-170 e153.

- 672 25. Jin, Y., Yu, X., Zhang, S., Kong, X., Chen, W., Luo, Q., Zheng, B., and Xiao, Y.  
673 (2020). Comparative Analysis of Virulence and Toxin Expression of Vancomycin-  
674 Intermediate and Vancomycin-Sensitive *Staphylococcus aureus* Strains. *Front*  
675 *Microbiol* *11*, 596942.
- 676 26. Knutsen, E., Johnsborg, O., Quentin, Y., Claverys, J.P., and Havarstein, L.S. (2006).  
677 BOX elements modulate gene expression in *Streptococcus pneumoniae*: impact on the  
678 fine-tuning of competence development. *J Bacteriol* *188*, 8307-8312.
- 679 27. Lalaouna, D., Carrier, M.C., Semsey, S., Brouard, J.S., Wang, J., Wade, J.T., and  
680 Masse, E. (2015). A 3' external transcribed spacer in a tRNA transcript acts as a  
681 sponge for small RNAs to prevent transcriptional noise. *Mol Cell* *58*, 393-405.
- 682 28. Langenberger, D., Bermudez-Santana, C., Hertel, J., Hoffmann, S., Khaitovich, P.,  
683 and Stadler, P.F. (2009). Evidence for human microRNA-offset RNAs in small RNA  
684 sequencing data. *Bioinformatics* *25*, 2298-2301.
- 685 29. Liu, N., Niu, G., Xie, Z., Chen, Z., Itzek, A., Kreth, J., Gillaspay, A., Zeng, L., Burne,  
686 R., Qi, F., *et al.* (2015). The *Streptococcus mutans irvA* gene encodes a trans-acting  
687 riboregulatory mRNA. *Mol Cell* *57*, 179-190.
- 688 30. Love, M.I., Huber, W., and Anders, S. (2014). Moderated estimation of fold change  
689 and dispersion for RNA-seq data with DESeq2. *Genome Biol* *15*, 550.
- 690 31. Lucas, B.A., Lavi, E., Shiue, L., Cho, H., Katzman, S., Miyoshi, K., Siomi, M.C.,  
691 Carmel, L., Ares, M., Jr., and Maquat, L.E. (2018). Evidence for convergent evolution  
692 of SINE-directed Staufen-mediated mRNA decay. *Proc Natl Acad Sci U S A* *115*,  
693 968-973.
- 694 32. Maquat, L.E. (2020). Short interspersed nuclear element (SINE)-mediated post-  
695 transcriptional effects on human and mouse gene expression: SINE-UP for active  
696 duty. *Philos Trans R Soc Lond B Biol Sci* *375*, 20190344.
- 697 33. Mayr, C. (2017). Regulation by 3'-Untranslated Regions. *Annu Rev Genet* *51*, 171-  
698 194.
- 699 34. McKellar, S.W., Ivanova, I., Arede, P., Zapf, R.L., Mercier, N., Chu, L.C., Mediati,  
700 D.G., Pickering, A.C., Briaud, P., Foster, R.G., *et al.* (2022). RNase III CLASH in  
701 MRSA uncovers sRNA regulatory networks coupling metabolism to toxin expression.  
702 *Nat Commun* *13*, 3560.
- 703 35. Mediati, D.G., Wong, J.L., Gao, W., McKellar, S., Pang, C.N.I., Wu, S., Wu, W., Sy,  
704 B., Monk, I.R., Biazik, J.M., *et al.* (2022). RNase III-CLASH of multi-drug resistant  
705 *Staphylococcus aureus* reveals a regulatory mRNA 3'UTR required for intermediate  
706 vancomycin resistance. *Nat Commun* *13*, 3558.
- 707 36. Mediati, D.G., Wu, S., Wu, W., and Tree, J.J. (2021). Networks of Resistance: Small  
708 RNA Control of Antibiotic Resistance. *Trends Genet* *37*, 35-45.
- 709 37. Menendez-Gil, P., Caballero, C.J., Catalan-Moreno, A., Irurzun, N., Barrio-  
710 Hernandez, I., Caldelari, I., and Toledo-Arana, A. (2020). Differential evolution in  
711 3'UTRs leads to specific gene expression in *Staphylococcus*. *Nucleic Acids Res* *48*,  
712 2544-2563.
- 713 38. Mercier, N., Prévost, K., Massé, E., Romby, P., Caldelari, I., Lalaouna, D. (2021).  
714 MS2-affinity purification coupled with RNA sequencing in Gram-positive bacteria. *J*  
715 *Vis Exp* *23*, 168.

- 716 39. Morrison, J.M., Miller, E.W., Benson, M.A., Alonzo, F., 3rd, Yoong, P., Torres, V.J.,  
717 Hinrichs, S.H., and Dunman, P.M. (2012). Characterization of SSR42, a novel  
718 virulence factor regulatory RNA that contributes to the pathogenesis of a  
719 *Staphylococcus aureus* USA300 representative. *J Bacteriol* *194*, 2924-2938.
- 720 40. Papenfort, K., Sun, Y., Miyakoshi, M., Vanderpool, C.K., and Vogel, J. (2013). Small  
721 RNA-mediated activation of sugar phosphatase mRNA regulates glucose  
722 homeostasis. *Cell* *153*, 426-437.
- 723 41. Purves, J., Blades, M., Arafat, Y., Malik, S.A., Bayliss, C.D., and Morrissey, J.A.  
724 (2012). Variation in the genomic locations and sequence conservation of STAR  
725 elements among staphylococcal species provides insight into DNA repeat evolution.  
726 *BMC Genomics* *13*, 515.
- 727 42. Reuter, J.S., and Mathews, D.H. (2010). RNAstructure: software for RNA secondary  
728 structure prediction and analysis. *BMC Bioinformatics* *11*, 129.
- 729 43. Rivas, E., Clements, J., and Eddy, S.R. (2020). Estimating the power of sequence  
730 covariation for detecting conserved RNA structure. *Bioinformatics* *36*, 3072-3076.
- 731 44. Said, N., Rieder, R., Hurwitz, R., Deckert, J., Urlaub, H., and Vogel, J. (2009). *In vivo*  
732 expression and purification of aptamer-tagged small RNA regulators. *Nucleic Acids*  
733 *Res* *37*, e133.
- 734 45. Sassi, M., Augagneur, Y., Mauro, T., Ivain, L., Chabelskaya, S., Hallier, M., Sallou,  
735 O., and Felden, B. (2015). SRD: a *Staphylococcus* regulatory RNA database. *RNA*  
736 *21*, 1005-1017.
- 737 46. Schindelin, J., Arganda-Carreras, I., Frise, E., Kaynig, V., Longair, M., Pietzsch, T.,  
738 Preibisch, S., Rueden, C., Saalfeld, S., Schmid, B., *et al.* (2012). Fiji: an open-source  
739 platform for biological-image analysis. *Nat Methods* *9*, 676-682.
- 740 47. Sullivan, M.J., Petty, N.K., and Beatson, S.A. (2011). Easyfig: a genome comparison  
741 visualizer. *Bioinformatics* *27*, 1009-1010.
- 742 48. Sutton, J.A.F., Carnell, O.T., Lafage, L., Gray, J., Biboy, J., Gibson, J.F., Pollitt,  
743 E.J.G., Tazoll, S.C., Turnbull, W., Hajdamowicz, N.H., *et al.* (2021). *Staphylococcus*  
744 *aureus* cell wall structure and dynamics during host-pathogen interaction. *PLoS*  
745 *Pathog* *17*, e1009468.
- 746 49. Sy BM, Tree JJ. (2021). Small RNA regulation of virulence in  
747 pathogenic *Escherichia coli*. *Front Cell Infect Microbiol* *27*;10:622202.
- 748 50. Tsai, C.J., Loh, J.M., Proft, T. (2016). *Galleria mellonella* infection models for the  
749 study of bacterial diseases and for antimicrobial drug testing. *Virulence*. *2*;7(3):214-  
750 29.
- 751 51. Sy, B., Wong, J., Granneman, S., Tollervey, D., Gally, D., and Tree, J.J. (2018).  
752 High-Resolution, High-Throughput Analysis of Hfq-Binding Sites Using UV  
753 Crosslinking and Analysis of cDNA (CRAC). *Methods Mol Biol* *1737*, 251-272.
- 754 52. Tong, S.Y., Davis, J.S., Eichenberger, E., Holland, T.L., and Fowler, V.G., Jr. (2015).  
755 *Staphylococcus aureus* infections: epidemiology, pathophysiology, clinical  
756 manifestations, and management. *Clin Microbiol Rev* *28*, 603-661.
- 757 53. Webb, S., Hector, R.D., Kudla, G., and Granneman, S. (2014). PAR-CLIP data  
758 indicate that Nrd1-Nab3-dependent transcription termination regulates expression of  
759 hundreds of protein coding genes in yeast. *Genome Biol* *15*, R8.

- 760        54. Weinberg, Z., and Breaker, R.R. (2011). R2R--software to speed the depiction of  
761                aesthetic consensus RNA secondary structures. *BMC Bioinformatics* 12, 3.  
762        55. Yao, Z., Weinberg, Z., and Ruzzo, W.L. (2006). CMfinder--a covariance model based  
763                RNA motif finding algorithm. *Bioinformatics* 22, 445-452.  
764

## 765 Figure Legends

766

767 **Figure 1.** The *vigR* 3' UTR varies in length between *S. aureus* isolates. **A.** Genomic  
768 alignment of the *vigR* transcript within 14 representative *S. aureus* strains extracted from  
769 dRNA-seq and Term-seq analyses. The VigR coding sequence (CDS) is represented in green  
770 and sequence expansion elements are indicated for the *fold* mRNA interaction seed (orange),  
771 *isaA* mRNA interaction seed (blue) and STAR repeat elements (red) (*right*) within the 3'  
772 UTR. The degree of sequence conservation is indicated (*right*). **B.** Northern blot analysis of  
773 the *vigR* transcript. Total RNA was purified from *S. aureus* isolates indicated (*top*) and  
774 probed for the *vigR* CDS. SYBR Green stained 23S and 16S ribosomal RNAs are indicated  
775 below as loading controls.

776

777 **Figure 2.** Spacer-STAR sequence repeats encode a conserved RNA structure. **A.** Consensus  
778 sequence motif of 101 spacer-STAR repeats identified within VISA isolate JKD6008  
779 determined using GLAM2 software. The numbering of positions in the motifs are based on  
780 the numbering of spacer-STAR 3 of *vigR* (see panel 2C). **B.** Consensus RNA structural motif  
781 of spacer-STAR repeats using CMFinder software identifies co-varying nucleotides.  
782 Statistically significant covariation (*green*) was determined using R-scape software. The  
783 numbering of positions in the motifs are based on the numbering of spacer-STAR 3 of *vigR*  
784 (see panel 2C). Probability of nucleotide presence and identities are indicated (*left*). **C.** The *in*  
785 *vitro* secondary structure of the *vigR* 3' UTR from VISA isolate JKD6008. Benzyl cyanide  
786 and lead acetate were used to modify the RNA backbone and nucleotide reactivity (*right*) was  
787 determined by separation on TBE-urea gels. The nucleotide positions are relative to the  
788 transcription start site of *vigR*. STAR motif 1 and 2 are indicated by grey boxes. Spacer-STAR  
789 repeat 3 is indicated by blue boxes. Each section (5' motif, spacer-stem, and STAR motif) are  
790 indicated for spacer-STAR 3. The nucleotides predicted to interact with *dapE* mRNA are  
791 indicated by the grey line. Asterisks indicated the positions where the *isaA* and *dapE*  
792 interaction sites overlap.

793

794 **Figure 3.** MAPS identifies the extended regulon of *vigR* 3' UTR in VISA JKD6008. **A.**  
795 Clusters of orthologous groups (COGs) detailed for the 81 statistically significant enriched  
796 transcripts found in duplicate MS2-*vigR* 3' UTR MAPS experiments ( $p < 0.01$ ). The most  
797 abundant COGs are listed in numerical order. **B.** Correlation of enriched transcripts from  
798 MAPS (*bottom*) with dysregulated transcripts from RNA-seq of JKD6008 *vigR*<sup>Δ3'UTR</sup> (*left*).  
799 The red dotted line indicates those transcripts with a log<sub>2</sub>FC ≥ 1 in both MAPS and RNA-seq.

800

801 **Figure 4.** The succinyl-diaminopimelate desuccinylase *dapE* is regulated by *vigR* 3' UTR. **A.**  
802 EMSA analysis of the RNA-RNA interaction between *vigR* 3' UTR and *dapE* mRNA. A total  
803 of 50 fM of radiolabelled *vigR* 3' UTR (*bottom*) was titrated against increasing  
804 concentrations of the *dapE* mRNA (*top*). The *isaA* fragment B (frag-B) RNA was titrated  
805 against 50 fM of radiolabelled *vigR* 3' UTR as a known negative control. **B.** The *dapE*  
806 mRNA was synthesised as sub-fragments (~400-nt in length) and used for EMSA analysis.  
807 *dapE* fragment B RNA and concentrations are indicated (*top*). Black arrowheads indicate  
808 migration of free, radiolabelled *vigR* 3' UTR and open arrowheads indicate slow migrating  
809 *vigR-dapE* duplexes. **C.** EMSA analysis of interactions between *vigR* 3' UTR and *dapE* frag-  
810 B (0 or 2.5 pmol). Antisense competitor oligonucleotides 1-4 (*top*) were spiked in at 500x  
811 excess concentration. **D.** The antisense oligonucleotide competitors 1-4 used for EMSA  
812 analysis are indicated relative to the *dapE* frag-B RNA. The start and end positions of *dapE*  
813 frag-B are indicated representative of the *dapE* transcription start site (+1 site). The predicted  
814 *in silico* interaction site is indicated in red (*top*). **E.** The predicted interaction seed between



815 the *vigR-dapE* RNA species. The start and end positions of the RNA-RNA duplex are  
816 indicated representative of the mRNA transcription start sites. **F.** Histogram of quantitative  
817 RT-PCR to quantify *dapE* chromosomal abundance (relative to *gapA*) in the pICS3 and  
818 pICS3::*vigR*<sup>3'UTR</sup> constructs (*top*). Error bars represent standard error of the mean (SEM).  
819  $p=0.0026$ ,  $n=4$ .

820

821 **Figure 5.** The *vigR* 3' UTR and *isaA* mRNA are required for pathogenesis. **A.** Kaplan-Meier  
822 survival plot of *Galleria mellonella* larvae infected with  $10^7$  CFU of *S. aureus* constructs  
823 (*top*) over the course of 6 days. Plots show an average of 4 independent replicates with 5  
824 larvae per replicate ( $n=20$ ). Significant differences between survival curves were determined  
825 by Log-rank test at  $*p<0.05$  and  $**p<0.005$ . **B.** The *vigR* 3' UTR contributes to vancomycin  
826 tolerance during infection. Larvae were infected with  $10^7$  CFU of JKD6008 and *vigR*<sup>Δ3'UTR</sup>  
827 strains and challenged with either 10 mg/kg of vancomycin or H<sub>2</sub>O over the course of 6 days.  
828 Plots show an average of 2 independent replicates with 10 larvae per replicate ( $n=20$ ).  
829 Significant differences between curves were determined by Log-rank test at  $*p<0.05$ .

# Figure 1

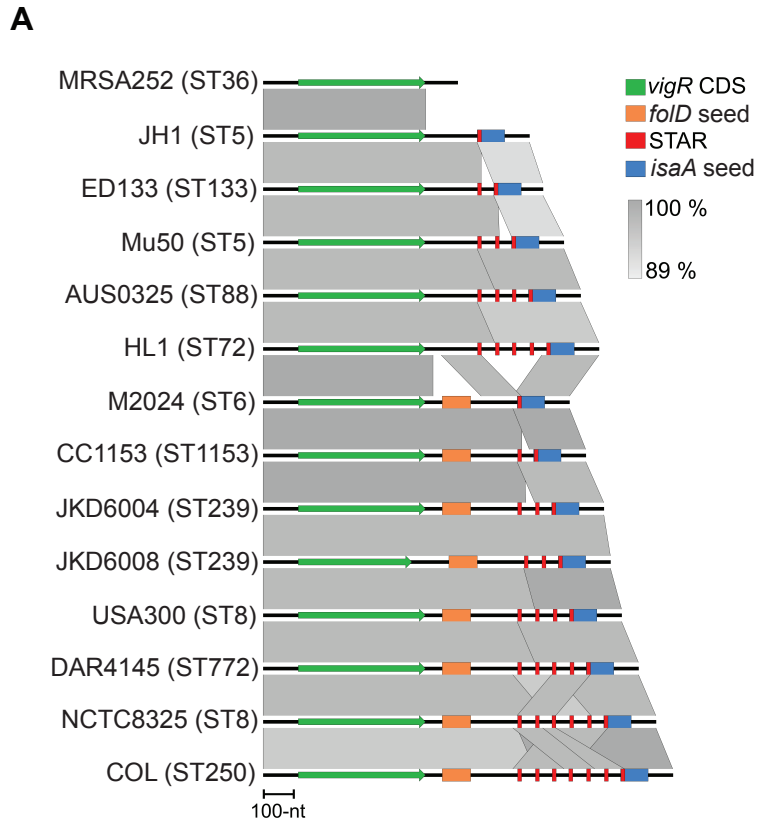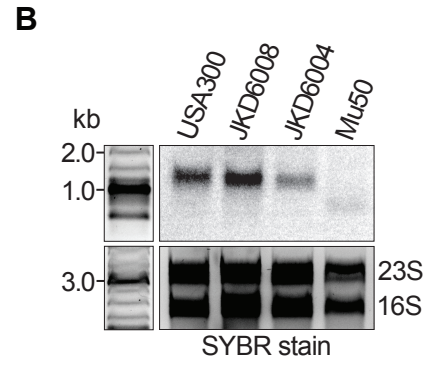

## Figure 2

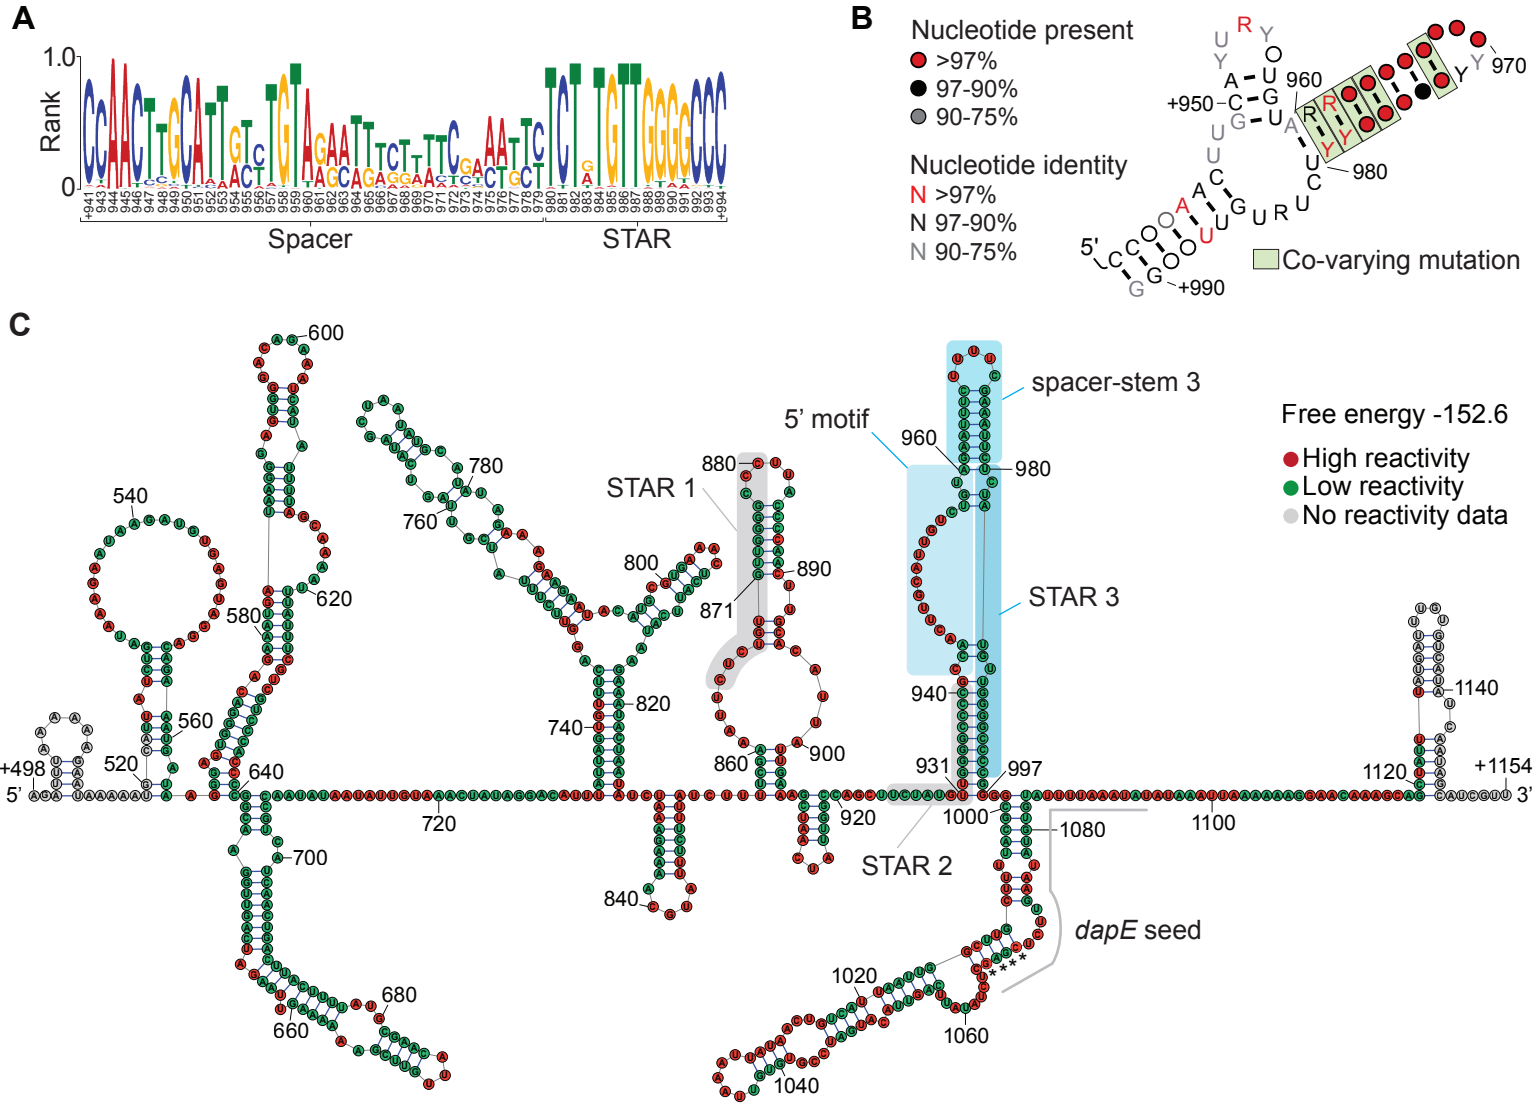

## Figure 3

A

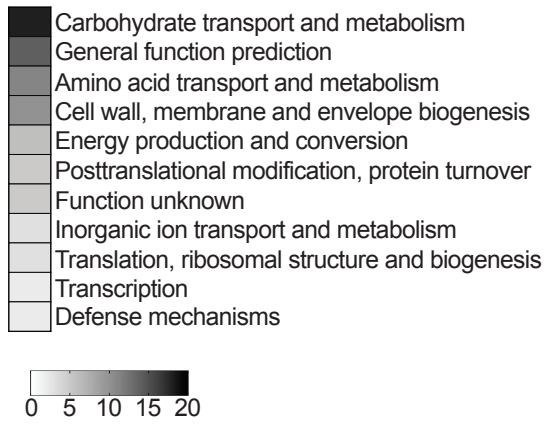

B

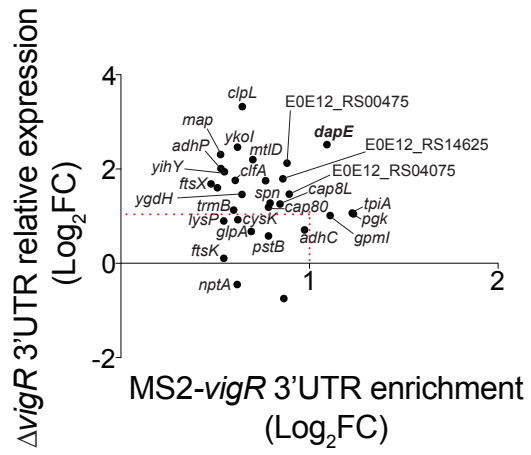

## Figure 4

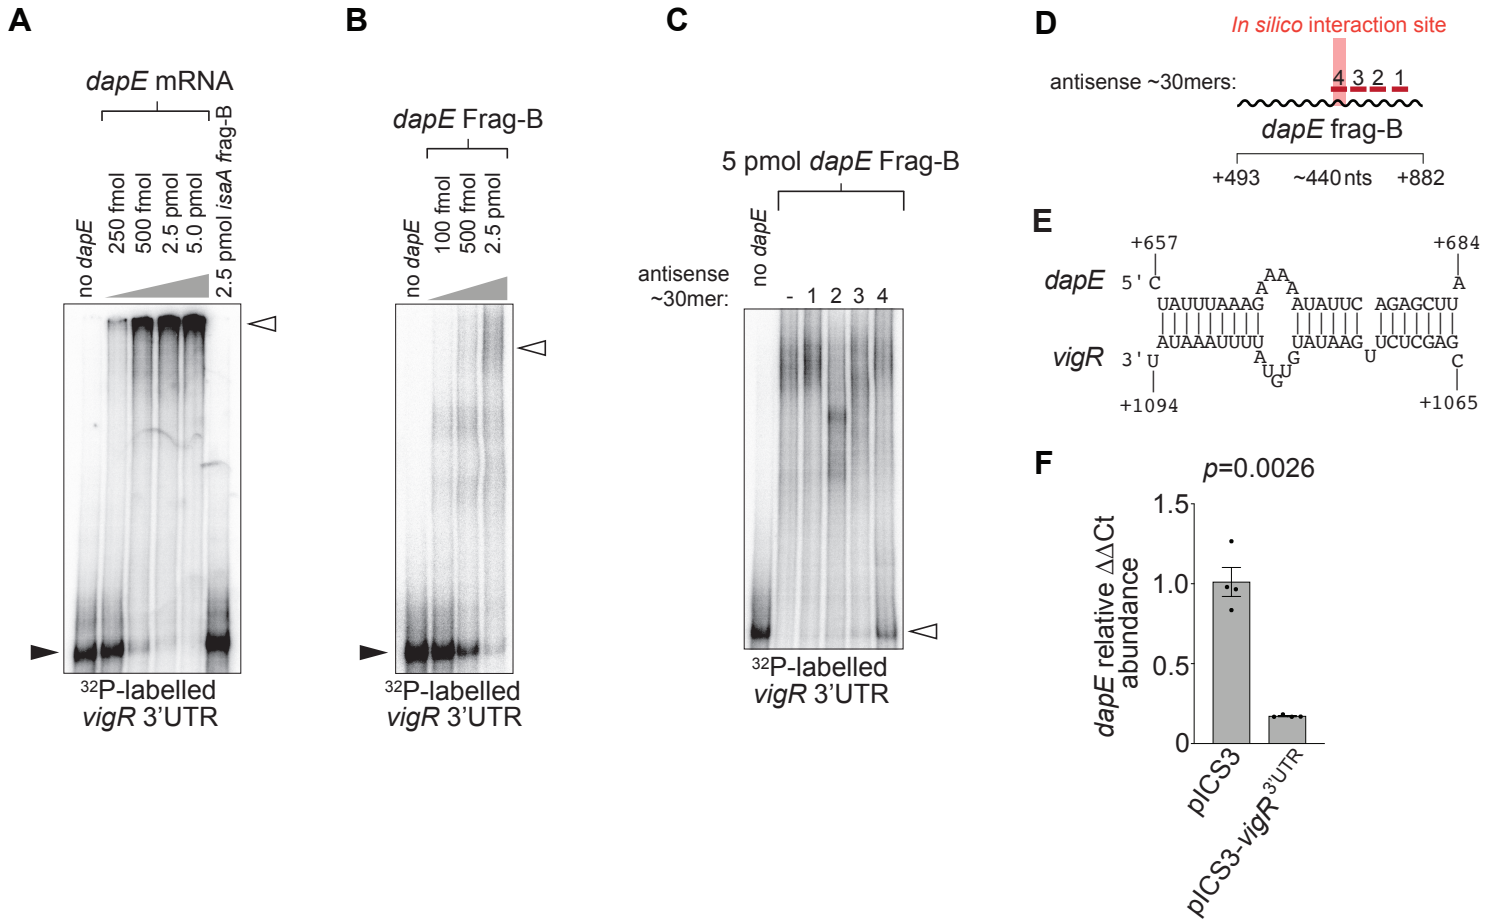

**Figure 5**

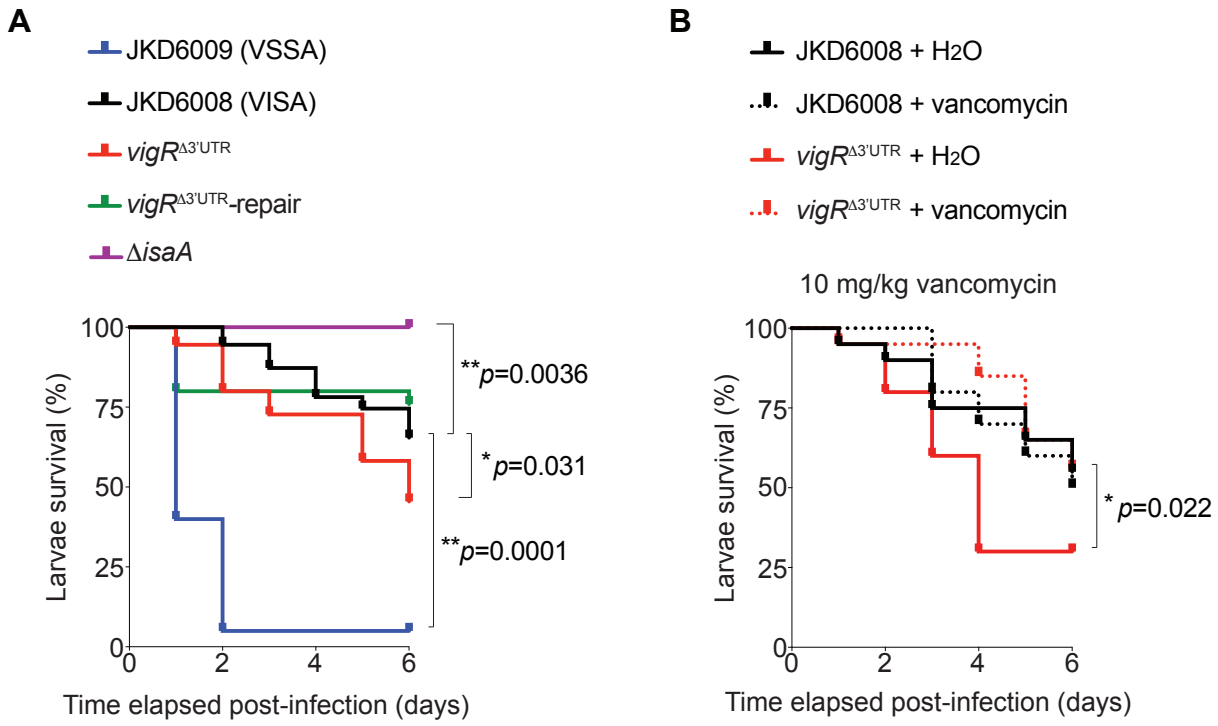

Source: https://www.biorxiv.org/content/biorxiv/early/2023/05/19/2023.05.16.541063.full.pdf
